# Supplementary material for: Redox regulation of NADP-malate dehydrogenase is vital for land plants under fluctuating light environment
Source: PubMed Central journal article supplement (PMC8017969; doi:10.1073/pnas.2016903118), 2021-02-02
Supplement: pnas.2016903118.sapp.pdf [file pnas.2016903118.sapp.pdf]

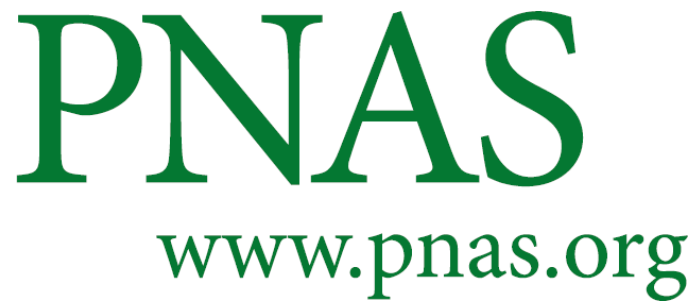

## Supplementary Information for

Redox regulation of NADP-malate dehydrogenase is vital for land plants under fluctuating light environment

Yuichi Yokochia, Keisuke Yoshida, Florian Hahn, Atsuko Miyagi, Ken-ichi Wakabayashi, Maki Kawai-Yamada, Andreas P. M. Weber, Toru Hisabori

Toru Hisabori

Email: [thisabor@res.titech.ac.jp](mailto:thisabor@res.titech.ac.jp)

### **This PDF file includes:**

SI appendix Figures. S1 to S10

SI appendix References

SI appendix Tables. S1 to S2

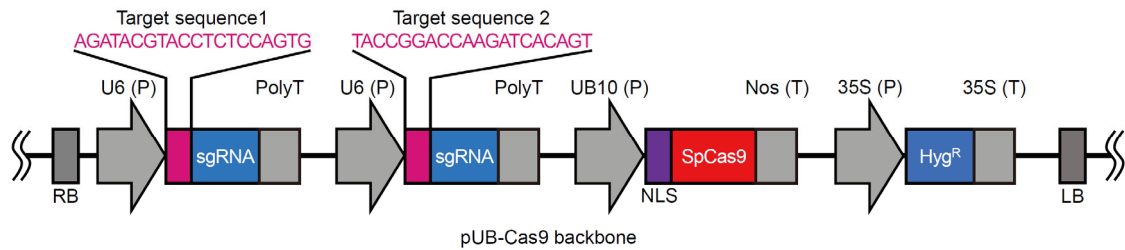

**SI appendix Fig. S1.** CRISPR/Cas9 construct for plant transformation. A plasmid structure between the right border (RB) and left border (LB) is shown with target sequences in single guide RNA (sgRNA). The pUB-Cas9 vector<sup>1</sup> was used as a backbone. Abbreviations: U6 (P), *U6-26* promoter; PolyT, poly thymidine transcription terminator; UB10 (P), *UBIQUITIN10* promoter; NLS, nuclear localization signal; SpCas9, *Streptococcus pyogenes*-derived Cas9; Nos (T), nopaline synthase terminator; 35S (P), *Cauliflower Mosaic Virus* 35S promoter; Hyg<sup>R</sup>, hygromycin resistance gene cassette; 35S (T), *Cauliflower Mosaic Virus* 35S terminator.

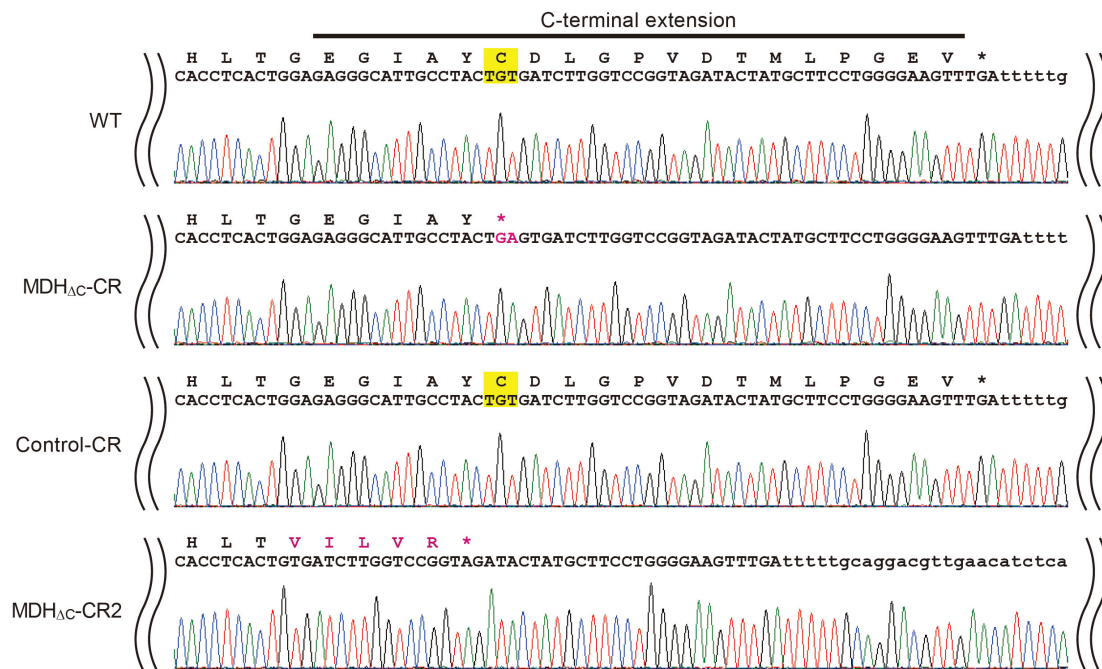

**SI appendix Fig. S2.** mRNA sequences of MDH. cDNA was synthesized from the RNA extract of each plant strain and its sequencing result is shown along with a translated amino acid sequence. MDH<sub>ΔC</sub>-CR2 is another line that expresses MDH without the C-terminal extension. The mutated sites are shown in magenta in the DNA and amino acid sequences. Letters highlighted in yellow represent the redox-regulated cysteines and codons that code the cysteines.

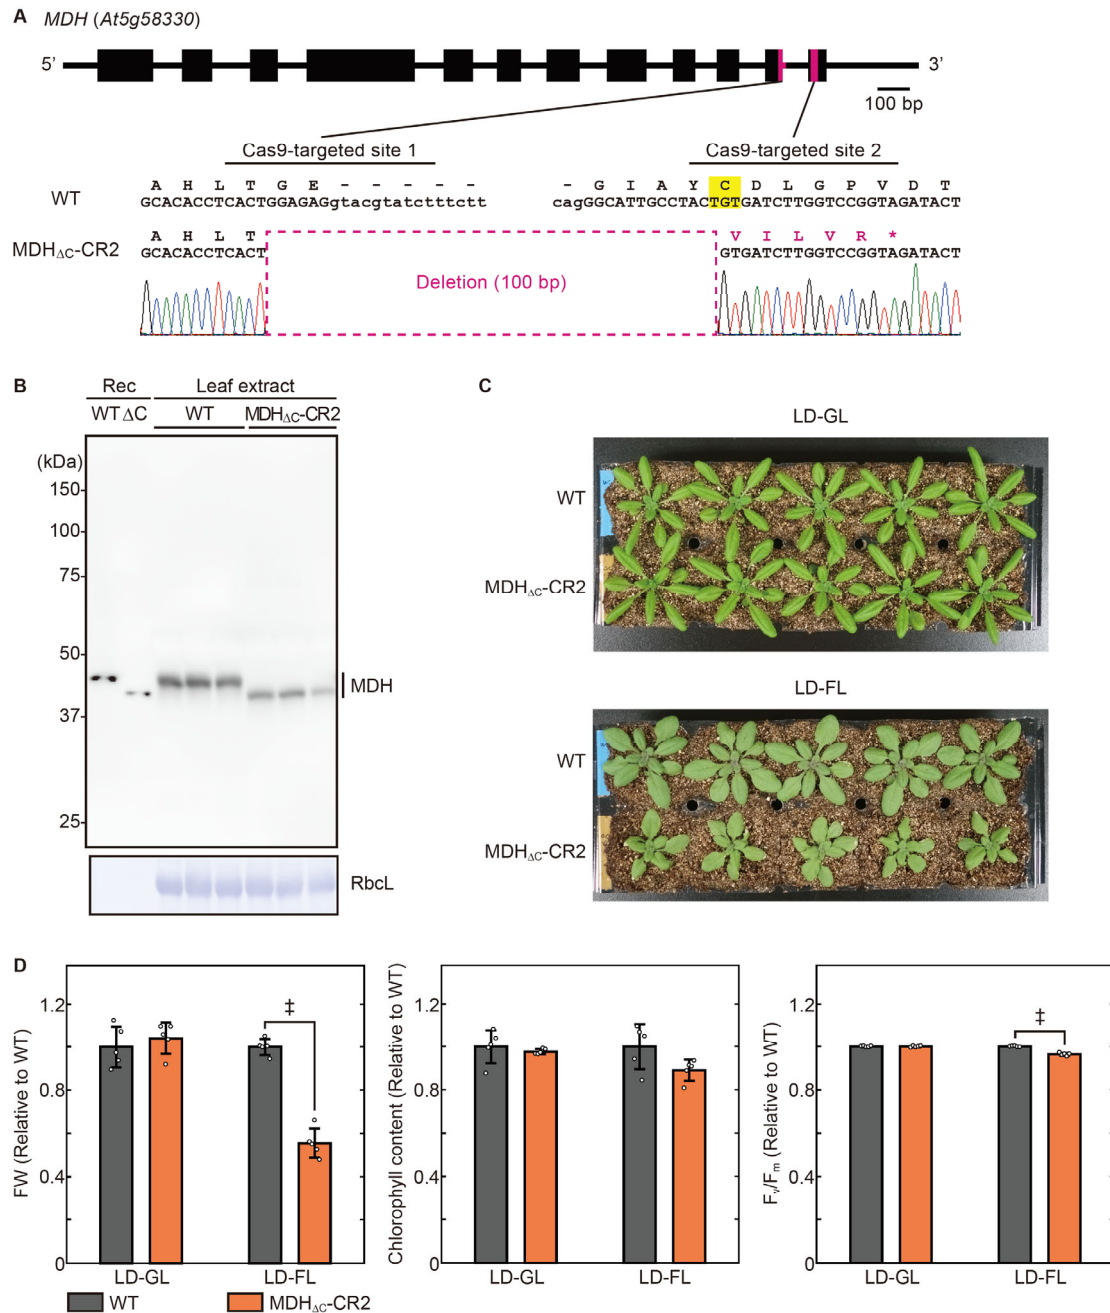

**SI appendix Fig. S3.** Physiological analyses of another line expressing MDH without the C-terminal extension (MDH $\Delta$ C-CR2). (A) Mutated site in *MDH* gene. Cas9-targeted sites are shown as magenta bars in *MDH* gene structure. A DNA sequencing result for each strain is shown with a translated amino acid sequence. The deleted DNA region is shown in magenta in the DNA sequencing result, and altered amino acids are also shown in magenta. Letters highlighted in yellow represent the redox-regulated cysteine and codon that codes the cysteine. (B) The

expression of MDH proteins in plant leaves. Rosette leave extract of each strain (3 biological replicates) was subjected to SDS-PAGE followed by Western blot analysis with anti-MDH antibodies. Recombinant (Rec) MDH proteins were used as markers. CBB-stained Rubisco large subunit (RbcL) is shown as a loading control. (C) Plants grown under LD-GL conditions for 28 days or LD-FL conditions for 23 days. (D) Physiological parameters of plants grown under LD-GL or LD-FL conditions. Each value is normalized by using the value of WT grown under the same conditions and presented as mean  $\pm$  SD (n = 5, biological replicates). Each symbol indicates a significant difference ( $\ddagger$ ,  $P < 0.001$ ; Welch's *t*-test) between the values of WT and MDH $_{\Delta C}$ -CR2 plants.

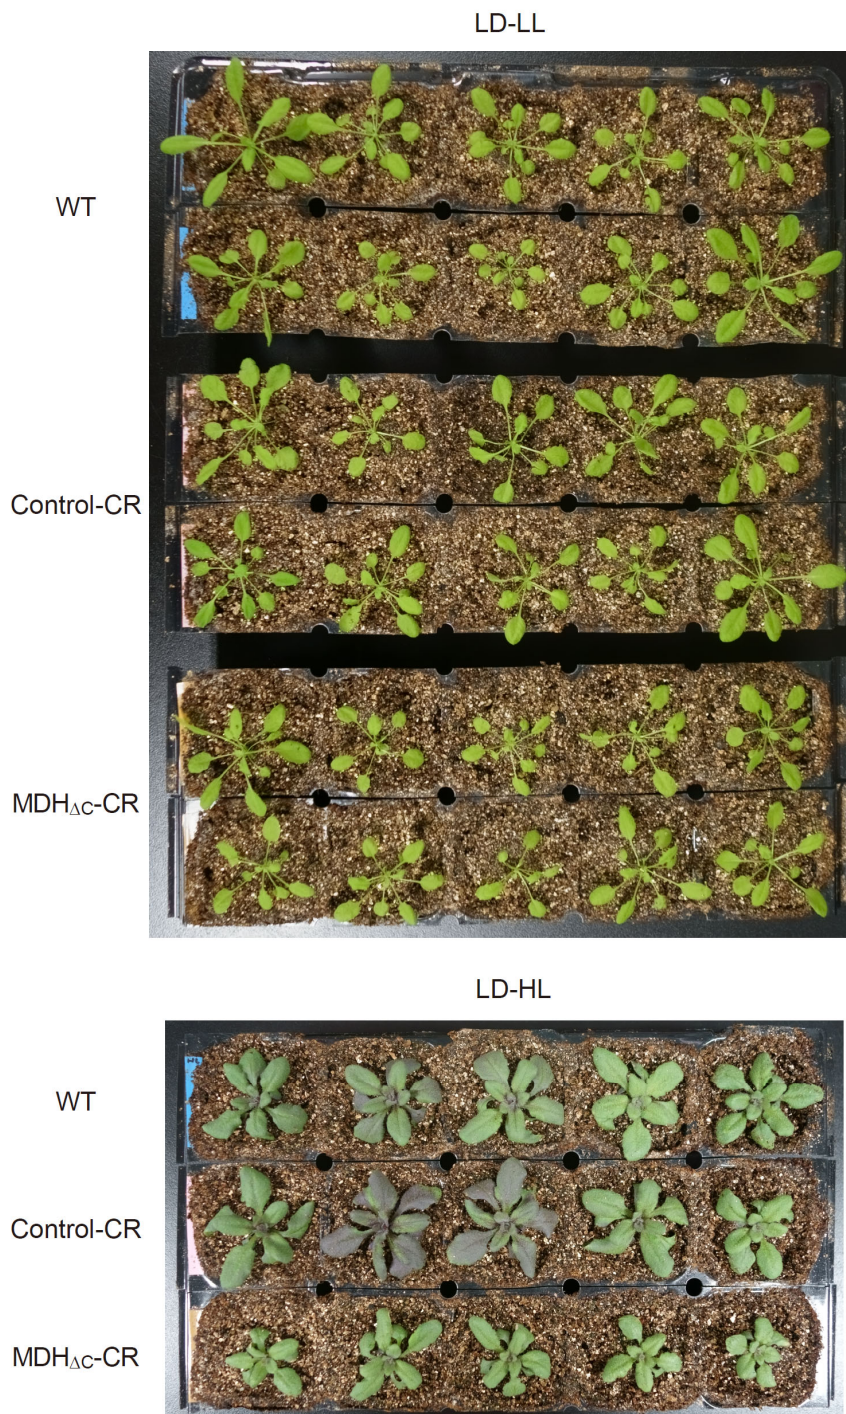

**SI appendix Fig. S4.** Plants grown under conditions with high or low light intensity. Plants were grown under the indicated conditions for 34 days (LD-LL) or 22 days (LD-HL).



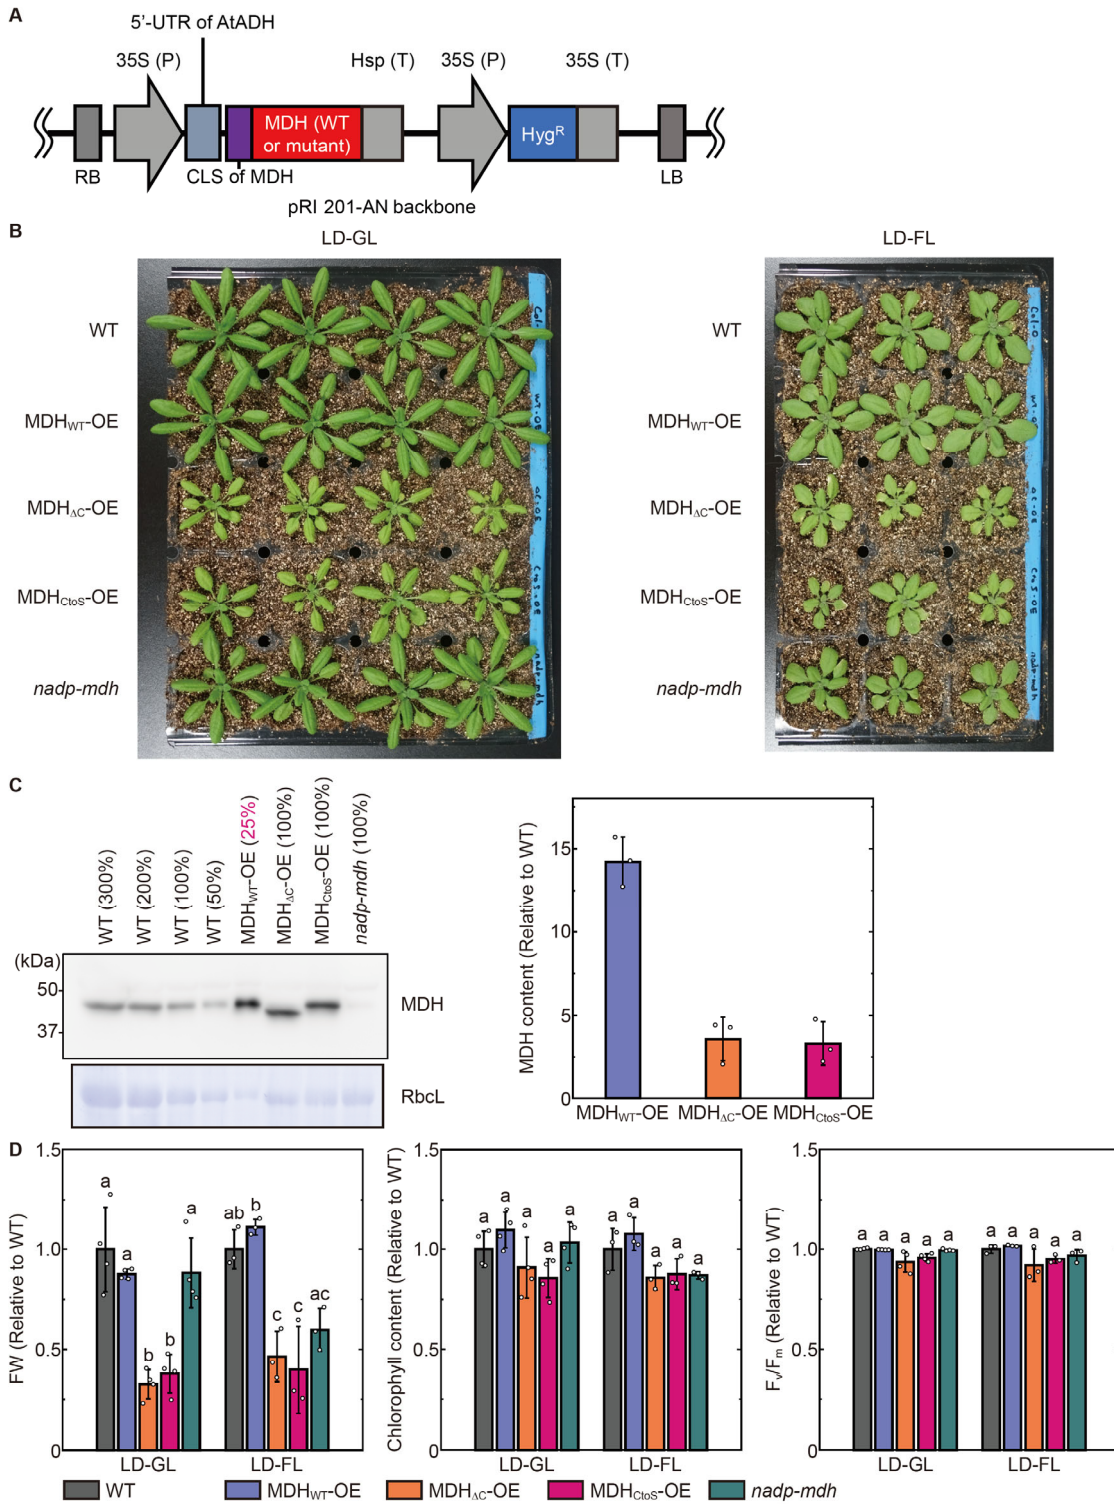

**SI appendix Fig. S5.** Physiological analyses of plants overexpressing WT or mutant MDH. (A) The construct for plant transformation and MDH overexpression (OE). A plasmid structure between the right border (RB) and left border (LB) is shown. The pRI 201-AN vector was used

as a backbone. Abbreviations: 35S (P), Cauliflower Mosaic Virus 35S promoter; AtADH, *A. thaliana* alcohol dehydrogenase; CLS, chloroplast localization signal; Hsp (T), heat shock protein terminator; Hyg<sup>R</sup>, hygromycin resistance gene cassette; 35S (T), Cauliflower Mosaic Virus 35S terminator. (B) Plants grown under LD-GL conditions for 28 days or LD-FL conditions for 23 days. *nadp-mdh* is an MDH-deficient plant line, and this was used as a background for plant transformation. (C) MDH content in each mutant plant. Values in parentheses represent a relative loaded protein amount. CBB-stained Rubisco large subunit (RbcL) is shown as a loading control. MDH content determined by measuring band intensity is presented as mean  $\pm$  SD (n = 3, biological replicates). (D) Physiological parameters of plants grown under LD-GL or LD-FL conditions. Each value is normalized by using the value of WT grown under the same conditions and presented as mean  $\pm$  SD (n = 4 (LD-GL) or 3 (LD-FL), biological replicates). Different letters indicate significant differences among plants grown under the same conditions ( $P < 0.01$ , one-way ANOVA and Tukey HSD).



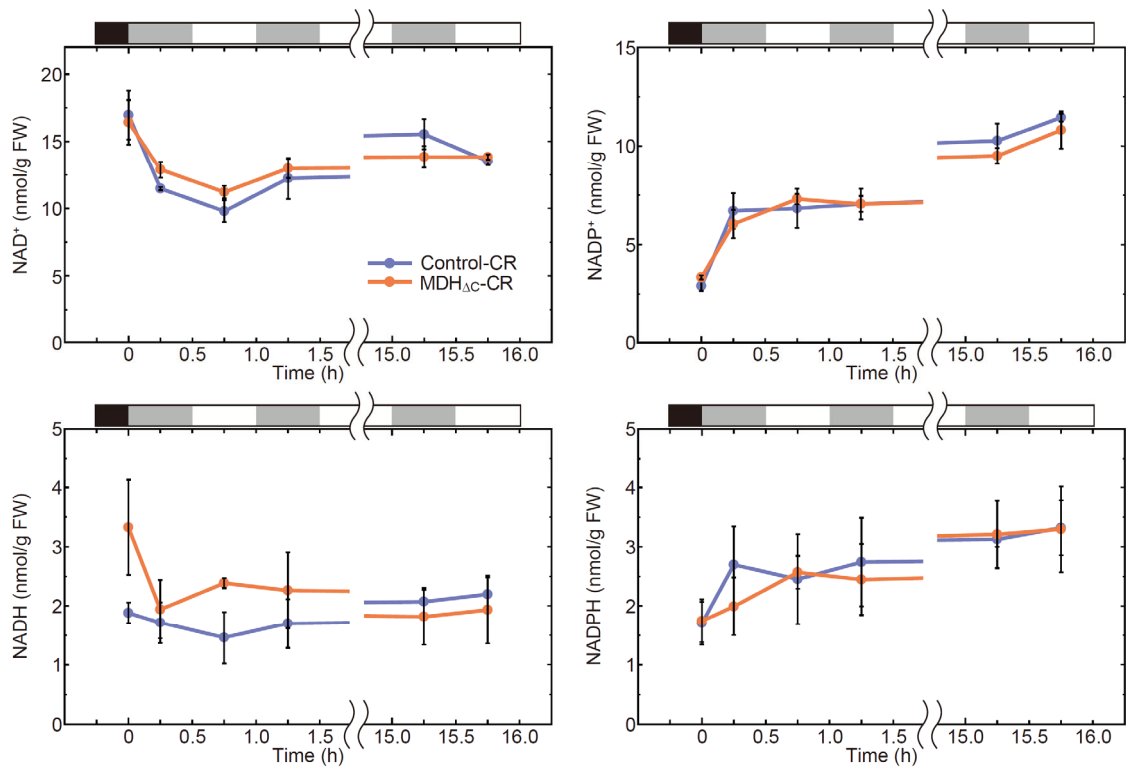

**SI appendix Fig. S6.** NAD(P)(H) dynamics in leaf extracts. Each value is presented as the mean  $\pm$  SD ( $n = 3$ , biological replicates). Black, gray, and white bars represent light intensities, 0, 60, and 650  $\mu\text{mol photons m}^{-2} \text{s}^{-1}$ . Plants grown under LD-GL conditions for 4 weeks were dark-adapted for 8 h and then used for the analyses.

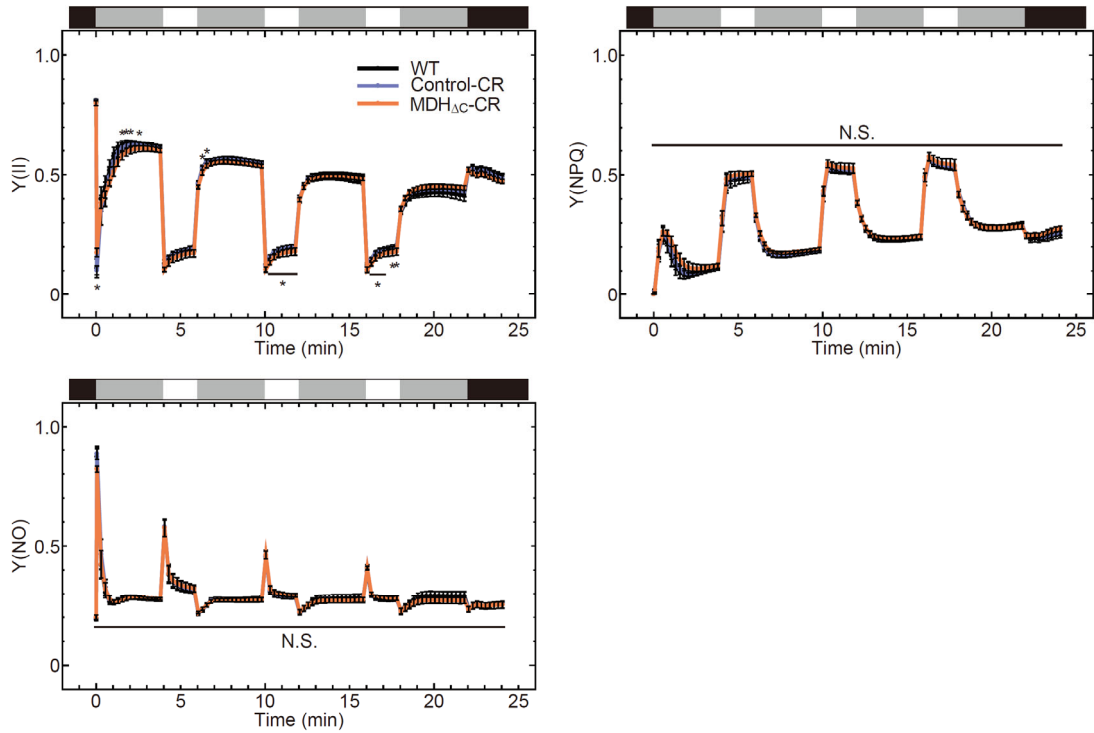

**SI appendix Fig. S7.** Photosynthetic parameters related to PSII capacity under fluctuating light conditions. Each value is presented as mean  $\pm$  SD ( $n = 5$ , biological replicates). Each symbol indicates a significant difference (\*,  $P < 0.05$ ; one-way ANOVA and Tukey HSD) between the values of MDH $\Delta$ C-CR plants and both WT and Control-CR plants. Any significant differences were not detected between the values of WT and Control-CR plants. In any point of Y(NPQ) and Y(NO), differences of values among plants were not significant (N.S.). Black, gray, and white bars represent light intensities, 0, 70, and 670  $\mu\text{mol photons m}^{-2} \text{s}^{-1}$ . Plants grown under LD-GL conditions for 4 weeks were dark-adapted for 8 h and then used for the analyses.

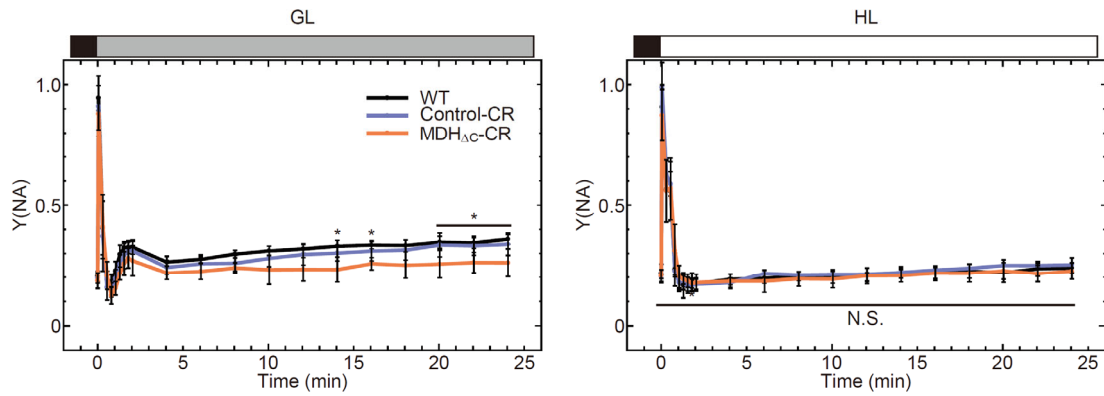

**SI appendix Fig. S8.** Transition of Y(NA) value under continuous GL or HL conditions. Each value is presented as mean  $\pm$  SD ( $n = 5$ , biological replicates). Each symbol indicates a significant difference (\*,  $P < 0.05$ ; one-way ANOVA and Tukey HSD) between the values of MDH $\Delta$ C-CR plants and both WT and Control-CR plants. Any significant differences were not detected between the values of WT and Control-CR plants. Under HL conditions, differences of values among plants were not significant (N.S.). Black, gray, and white bars represent light intensities, 0, 70, and 670  $\mu\text{mol photons m}^{-2} \text{s}^{-1}$ . Plants grown under LD-GL conditions for 4 weeks were dark-adapted for 8 h and then used for the analyses.

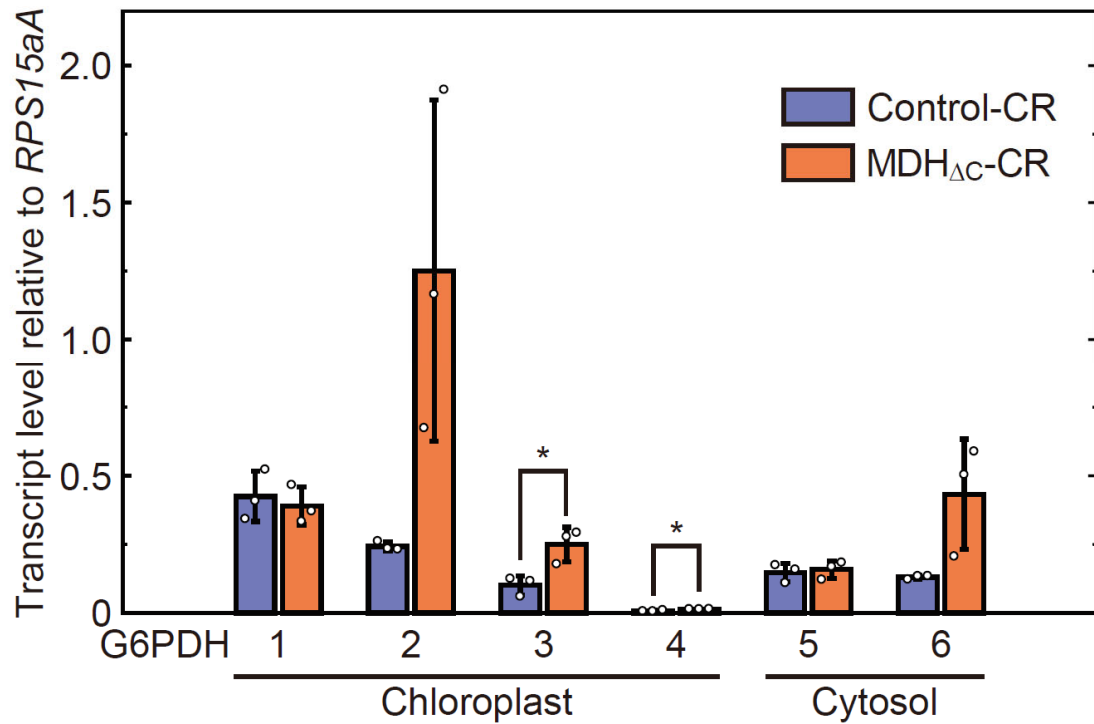

**SI appendix Fig. S9.** Transcript levels of G6PDH isoforms in the dark. Transcript levels of *G6PDH1* (*At5g35790*), *G6PDH2* (*At5g13110*), *G6PDH3* (*At1g24280*), *G6PDH4* (*At1g09420*), *G6PDH5* (*At3g27300*), *G6PDH6* (*At5g40760*), and *RPS15aA* (*At1g07770*) genes were determined by quantitative PCR. G6PDH isoforms 1–4 are localized in chloroplasts, and isoforms 5 and 6 are localized in the cytosol<sup>2</sup>. Each value is normalized by the transcript level of *RPS15aA* gene (*At1g07770*), which encodes one of the ribosomal proteins, and presented as mean  $\pm$  SD (n = 3, biological replicates). Each symbol indicates a significant difference (\*,  $P < 0.05$ ; Welch's *t*-test) between the values of Control-CR and MDH $\Delta$ C-CR plants.

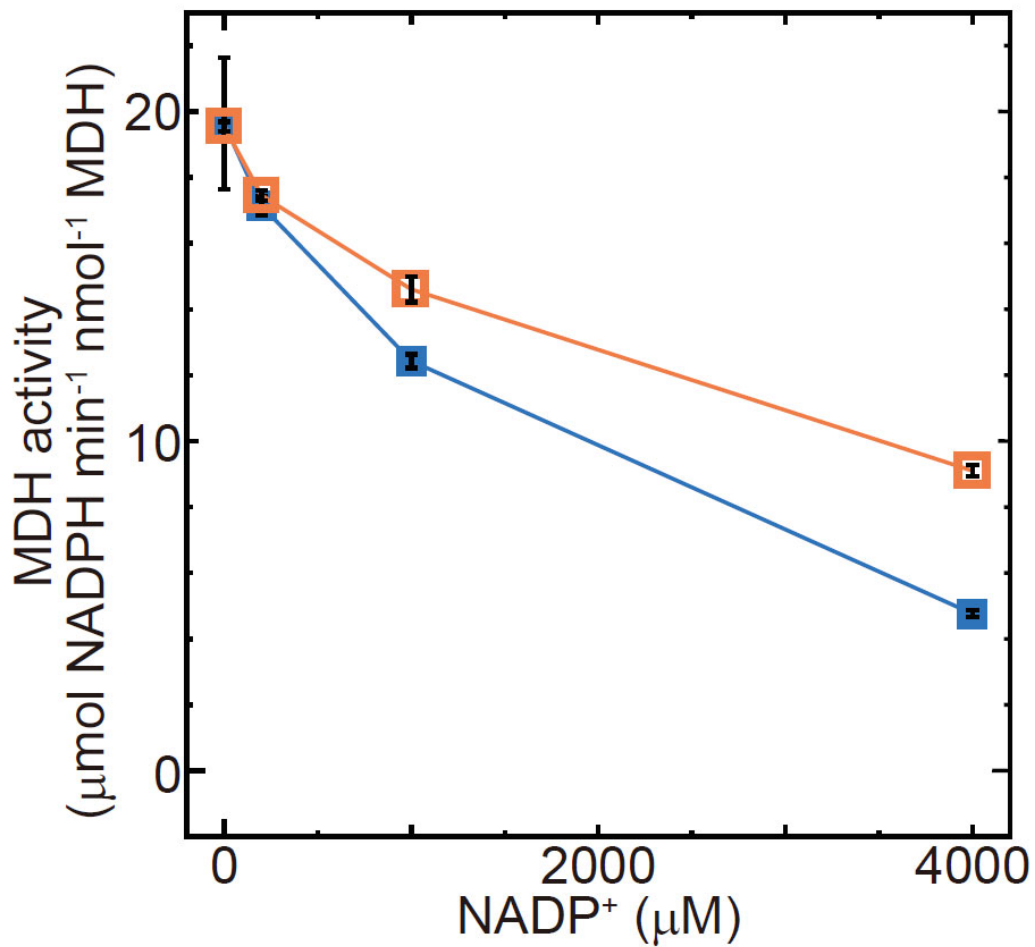

**SI appendix Fig. S10.** Feedback inhibition of the activities of MDH<sub>WT</sub> (blue symbol) and MDH<sub>ΔC</sub> (orange symbol) by  $\text{NADP}^+$ . Buffer containing 50 mM Tris-HCl (pH 7.5), 50 mM NaCl, 0.01  $\mu\text{M}$  reduced MDH<sub>WT</sub> or MDH<sub>ΔC</sub>, 100  $\mu\text{M}$  NADPH, 200  $\mu\text{M}$  oxaloacetate, and 0–4000  $\mu\text{M}$   $\text{NADP}^+$  was used. Values are presented as mean  $\pm$  SD ( $n = 3$ , one measurement for each independently prepared (pre-treated) sample). For the data of 0  $\mu\text{M}$   $\text{NADP}^+$ , the data of 200  $\mu\text{M}$  oxaloacetate in Fig. 1D were used.

### SI appendix References

1. Hahn F, Eisenhut M, Mantegazza O, Weber APM. Generation of Targeted Knockout Mutants in *Arabidopsis thaliana* Using CRISPR/Cas9. *Bio-Protocol* **7**, (2017).
2. Wakao S, Benning C. Genome-wide analysis of glucose-6-phosphate dehydrogenases in *Arabidopsis*. *Plant J* **41**, 243–256 (2005).
3. Yoshida K, Hisabori T. Two distinct redox cascades cooperatively regulate chloroplast functions and sustain plant viability. *Proc Natl Acad Sci U S A* **113**, E3967–3976 (2016).



**SI appendix Table S1. Result of the metabolome analysis.**

| Metabolite | End of dark    |                       | End of light  |                       |
|------------|----------------|-----------------------|---------------|-----------------------|
|            | Control-CR     | MDH <sub>ΔC</sub> -CR | Control-CR    | MDH <sub>ΔC</sub> -CR |
| Ornithine  | 2.37 ± 0.36    | 2.81 ± 0.62           | 3.33 ± 0.50   | 3.11 ± 0.43           |
| Lys        | 16.0 ± 1.2     | 14.8 ± 0.89           | 11.3 ± 0.80   | 9.53 ± 1.3            |
| Arg        | 7.85 ± 1.9     | 8.70 ± 1.0            | 16.5 ± 1.2    | 18.9 ± 1.6            |
| Ala        | 454 ± 74       | 875 ± 290             | 574 ± 61      | 675 ± 54              |
| Asn        | 316 ± 32       | 282 ± 15              | 314 ± 27      | 345 ± 18              |
| Gln        | 1,210 ± 140    | 755 ± 45              | 2,190 ± 180   | 2,140 ± 120           |
| Glu        | 2,830 ± 200    | 3,060 ± 170           | 2,040 ± 100   | 1,630 ± 160           |
| Asp        | 1,590 ± 120    | 1,350 ± 200           | 1,840 ± 80    | 1,390 ± 110           |
| His        | 17.7 ± 3.8     | 17.3 ± 1.4            | 28.3 ± 1.1    | 28.7 ± 2.8            |
| Gly        | 26.0 ± 24      | 19.0 ± 5.5            | 252 ± 68      | 268 ± 89              |
| Ile        | 10.4 ± 3.2     | 9.20 ± 1.0            | 15.4 ± 0.92   | 13.3 ± 1.1            |
| Leu        | 10.5 ± 5.2     | 11.0 ± 1.9            | 10.6 ± 0.52   | 11.1 ± 1.7            |
| Met        | 3.91 ± 0.61    | 3.42 ± 0.42           | 12.1 ± 1.6    | 9.01 ± 1.5            |
| Pro        | 131 ± 17       | 197 ± 52              | 138 ± 30      | 173 ± 37              |
| Phe        | 19.2 ± 3.1     | 15.6 ± 1.3            | 51.7 ± 3.8    | 40.3 ± 8.5            |
| Cys        | 2.72 ± 0.66    | 2.39 ± 0.58           | 2.86 ± 0.84   | 3.77 ± 0.89           |
| GABA       | 12.1 ± 4.9     | 54.8 ± 62             | 4.14 ± 1.1    | 7.54 ± 4.1            |
| Ser        | 327 ± 130      | 271 ± 51              | 803 ± 110     | 995 ± 72              |
| Val        | 35.3 ± 5.7     | 34.6 ± 1.9            | 48.5 ± 2.1    | 45.7 ± 3.7            |
| HomoSer    | 1.11 ± 0.27    | 1.24 ± 0.21           | 7.78 ± 0.65   | 5.55 ± 1.0            |
| Thr        | 367 ± 100      | 157 ± 27              | 850 ± 38      | 519 ± 75              |
| Trp        | 6.02 ± 1.4     | 5.34 ± 1.1            | 8.04 ± 1.0    | 6.71 ± 0.68           |
| Citrulline | 32.4 ± 3.4     | 19.1 ± 2.0            | 138 ± 12      | 122 ± 15              |
| Tyr        | 3.46 ± 1.7     | 4.54 ± 1.2            | 8.31 ± 0.31   | 7.07 ± 1.3            |
| Aconitate  | 109 ± 6.4      | 99.4 ± 9.2            | 26.2 ± 19     | 21.6 ± 7.4            |
| Isocitrate | 34.5 ± 12      | 35.6 ± 5.4            | 26.3 ± 4.5    | 36.0 ± 3.1            |
| Citrate    | 21,600 ± 1,900 | 19,100 ± 1,700        | 3,950 ± 1,300 | 7,940 ± 1,200         |
| Fumarate   | 4,610 ± 550    | 3,160 ± 520           | 8,530 ± 630   | 6,410 ± 210           |
| Malate     | 4,690 ± 730    | 3,880 ± 850           | 7,020 ± 570   | 9,000 ± 490           |
| 2OG        | 22.8 ± 3.4     | 19.5 ± 4.2            | 12.2 ± 7.0    | 3.62 ± 3.5            |
| Succinate  | 332 ± 35       | 253 ± 92              | 49.6 ± 25     | 24.1 ± 22             |

**SI appendix Table S1. (Continued)**

| Metabolite | End of dark   |                       | End of light |                       |
|------------|---------------|-----------------------|--------------|-----------------------|
|            | Control-CR    | MDH <sub>ΔC</sub> -CR | Control-CR   | MDH <sub>ΔC</sub> -CR |
| Lactate    | 84.9 ± 35     | 115 ± 70              | 51.1 ± 24    | 47.2 ± 15             |
| Ascorbate  | 1,360 ± 130   | 1,330 ± 130           | 1,890 ± 180  | 1,480 ± 77            |
| PEP        | 12.9 ± 1.2    | 8.19 ± 5.0            | 21.4 ± 4.9   | 26.9 ± 5.4            |
| PGA        | 53.2 ± 6.7    | 37.8 ± 8.6            | 168 ± 31     | 187 ± 51              |
| FBP        | 0.333 ± 0.31  | N.D.                  | 0.119 ± 0.27 | 0.310 ± 0.43          |
| DHAP       | 0.486 ± 1.1   | 0.668 ± 1.5           | 9.13 ± 3.3   | 7.17 ± 2.3            |
| G-3P       | 5.16 ± 1.9    | 4.72 ± 1.2            | 11.2 ± 3.0   | 10.7 ± 0.74           |
| GAP        | N.D.          | N.D.                  | N.D.         | 2.37 ± 2.5            |
| G1P        | 7.63 ± 1.6    | 6.16 ± 2.9            | 13.7 ± 4.9   | 17.5 ± 1.4            |
| F6P        | 32.3 ± 3.9    | 27.0 ± 3.3            | 78.2 ± 6.8   | 69.4 ± 6.5            |
| G6P        | 148 ± 13      | 137 ± 11              | 262 ± 23     | 209 ± 17              |
| RuBP       | 0.415 ± 0.58  | N.D.                  | 4.07 ± 1.6   | 6.11 ± 2.8            |
| 6PG        | 0.151 ± 0.34  | 0.261 ± 0.58          | N.D.         | 0.342 ± 0.77          |
| Ru5P       | 0.379 ± 0.35  | 1.61 ± 0.99           | 3.52 ± 0.86  | 4.03 ± 1.5            |
| R5P        | 0.0926 ± 0.21 | 1.17 ± 0.68           | 3.44 ± 0.62  | 2.74 ± 0.65           |
| S7P        | 2.77 ± 0.51   | 43.9 ± 8.7            | 50.3 ± 6.2   | 32.9 ± 5.4            |
| Cinnamate  | 41.3 ± 3.9    | 45.1 ± 5.9            | 29.7 ± 2.2   | 25.1 ± 3.7            |
| Shikimate  | 26.4 ± 6.7    | 53.1 ± 5.7            | 38.3 ± 9.6   | 60.9 ± 16             |

Each value represents the mean (μmol/g fresh weight) ± SD (n = 5, biological replicates).

N.D.: not detected.

**SI appendix Table S2. Primers used in this study.**

| Name               | Sequence                                    | Purpose                     |
|--------------------|---------------------------------------------|-----------------------------|
| MDH mature F       | ACATATGTCCGTTTCTCAAAATAGC                   | MDH plasmid construction    |
| MDH mature R       | GAAACGGACATATGTATATCTCCTTC                  | MDH plasmid construction    |
| MDH $\Delta$ C F   | GCCTACTAGTGATCTTGGTCCGGTAG                  | Site-directed mutagenesis   |
| MDH $\Delta$ C R   | AGATCACTAGTAGGCAATGCCCTCTC                  | Site-directed mutagenesis   |
| MDH C430S F        | GCCTACTCAGATCTTGGTCCGGTAGAT                 | Site-directed mutagenesis   |
| MDH C430S R        | AAGATCTGAGTAGGCAATGCCCTCTCC                 | Site-directed mutagenesis   |
| MDH C418S F        | AAGAGATCAGTTGCACACCTCACTGGA                 | Site-directed mutagenesis   |
| MDH C418S R        | TGCAACTGATCTCTTCTCAGCCAACAG                 | Site-directed mutagenesis   |
| MDH C77S F         | AAAGAGTCATATGGAGTGTTCTGCCTC                 | Site-directed mutagenesis   |
| MDH C77S R         | TCCATATGACTCTTTCTTCGTCTTCAC                 | Site-directed mutagenesis   |
| MDH C82S F         | GTGTTCTCACTCACCTATGATCTTAAA                 | Site-directed mutagenesis   |
| MDH C82S R         | GGTGAGTGAGAACACTCCATATGACTC                 | Site-directed mutagenesis   |
| sgRNA1 F           | ATTGAGATACGTACCTCTCCAGTG                    | sgRNA subcloning            |
| sgRNA1 R           | AAACCACTGGAGAGGTACGTATCT                    | sgRNA subcloning            |
| sgRNA2 F           | ATTGTACCGGACCAAGATCACAGT                    | sgRNA subcloning            |
| sgRNA2 R           | AAACACTGTGATCTTGGTCCGGTA                    | sgRNA subcloning            |
| FH41 <sup>a</sup>  | AAACGACGGCCAGTGCCAGAATTGGG-<br>CCCGACGTCG   | CRISPR plasmid construction |
| FH42 <sup>a</sup>  | TACTGACTCGTCGGGTACCAAGCTAT-<br>GCATCCAACGCG | CRISPR plasmid construction |
| FH254 <sup>a</sup> | GCCCAATTCCAAGCTATGCATCCAAC-<br>GCG          | CRISPR plasmid construction |
| FH255 <sup>a</sup> | CATAGCTTGGAATTGGGCCCGACGTCG                 | CRISPR plasmid construction |
| FH61 <sup>a</sup>  | CTGCCCAACGAGAAGGTGC                         | Screening                   |
| FH201 <sup>a</sup> | AGTCGGACAGGCGGTTGATG                        | Screening                   |
| MDH gDNA F         | GGTTAGAAGAGGGATTCACTGAG                     | Screening, cDNA sequencing  |
| MDH gDNA R         | ACTGGAATAAAGCATAGAAACG                      | Screening                   |
| MDH seq            | TTCTGCTGCTTCTACTGCTG                        | gDNA sequencing             |
| G6PDH1 F           | GTTTTGCTACTAATTTAGACAATGCAAC                | qPCR                        |
| G6PDH1 R           | TATCTCTCTTGGATACCTGGATCG                    | qPCR                        |
| G6PDH2 F           | CTTTATGCAAGATGGTGCAATAGTC                   | qPCR                        |
| G6PDH2 R           | GGCTTTGACCATCAGATTCTACTC                    | qPCR                        |

**SI appendix Table S2. (continued)**

| Name                            | Sequence                                 | Purpose                     |
|---------------------------------|------------------------------------------|-----------------------------|
| G6PDH3 F                        | CGCTGATCAATGTTGTTGACCC                   | qPCR                        |
| G6PDH3 R                        | TGGCTACTGATCCATCTTGAC                    | qPCR                        |
| G6PDH4 F                        | TTGCTCTATAAAGACAGGTATAAAACCG             | qPCR                        |
| G6PDH4 R                        | GCTGTGTGATGCTTGTCTATCTCTTC               | qPCR                        |
| G6PDH5 F                        | TGTAAGAATAACAATCCAGTCACG                 | qPCR                        |
| G6PDH5 R                        | GGATTAAGAAATCCCTGATGAAATAG               | qPCR                        |
| G6PDH6 F                        | TGATTCGTTTGTGAGAGAATATGG                 | qPCR                        |
| G6PDH6 R                        | ATTGAGAAATCCCTGACGGTATAAG                | qPCR                        |
| RPS15aA F <sup>b</sup>          | GAAGCACGGTTACATTGGTG                     | qPCR                        |
| RPS15aA R <sup>b</sup>          | TGTCTAGAAGGGAGCAAACG                     | qPCR                        |
| HygR F                          | GCGATGGACTAGTGCTTGCTCTAAAC-<br>CTCGTTC   | HygR cassette exchange      |
| HygR R                          | GGAAGTACTAGTAGCAGCTTGCCAA-<br>CATGG      | HygR cassette exchange      |
| pRI201 (cassette<br>exchange) F | AGCTGCTACTAGTCAGTTCCAAACGT-<br>AAAACGG   | HygR cassette exchange      |
| pRI201 (cassette<br>exchange) R | AGCAAGCACTAGTCCATCGCCCTGAT-<br>AGACGG    | HygR cassette exchange      |
| MDH transit F                   | TCACTGTTGATACATATGGCCATGGC-<br>AGAGCTCTC | MDH-OE plasmid construction |
| MDH transit R                   | CTTGGCTATTTTGAGAAACGG                    | MDH-OE plasmid construction |
| MDH in pET23c R                 | AGAATTGTGCGACAGCCGGATCTCAGTGG            | MDH-OE plasmid construction |
| pRI201 (MDH<br>integration) F   | TCCGGCTGTGCGACAATTCTGAATCAAC             | MDH-OE plasmid construction |
| pRI201 (MDH<br>integration) R   | GCCATATGTATCAACAGTGAAG                   | MDH-OE plasmid construction |
| Salk LBb1.3 <sup>c</sup>        | ATTTTGCCGATTTTCGGAAC                     | Screening                   |

<sup>a</sup>Primers used in a previous study <sup>1</sup>.

<sup>b</sup>Primers used in a previous study <sup>3</sup>.

<sup>c</sup>Primer used for Salk line screening (<http://signal.salk.edu/>).
